## Bacteriome of western corn rootworm life stages in different soils

1 For: PLOS Biology

2

3 Long title: **Survey of bacteria associated with western corn rootworm life stages reveals no**  
4 **difference between insects reared in different soils**

5 Short title: Bacteriome of western corn rootworm life stages in different soils

6

7 Dalton C. Ludwick<sup>1§</sup>, Aaron C. Ericsson<sup>2</sup>, Lisa N. Meihls<sup>3,✉</sup>, Michelle L.J. Gregory<sup>4</sup>, Deborah L.  
8 Finke<sup>1</sup>, Thomas A. Coudron<sup>1,4</sup>, Bruce E. Hibbard<sup>1,3</sup>, and Kent S. Shelby<sup>\*1,4</sup>

9

10

11 <sup>1</sup>Division of Plant Sciences, University of Missouri, Columbia, MO 65211

12 <sup>2</sup>Dept. of Veterinary Pathobiology, University of Missouri, Columbia, MO 65201

13 <sup>3</sup>USDA-ARS, 205 Curtis Hall, University of Missouri, Columbia, MO 65211

14 <sup>4</sup>USDA-ARS, 1503 S. Providence Rd., Columbia, MO 65201

15 \*Corresponding author: [Kent.Shelby@ars.usda.gov](mailto:Kent.Shelby@ars.usda.gov)

16

17 §Current Address: USDA-ARS, 2217 Wiltshire Rd., Kearneysville, WV 25430, USA.

18

19 ✉Current Address: Evogene, Ltd., 1005 N. Warson Rd., Saint Louis, MO 63132, USA.

20

21

### 22 **Author contact information**

23 DCL: [daltonludwick@gmail.com](mailto:daltonludwick@gmail.com)

24 ACE: [ericssona@missouri.edu](mailto:ericssona@missouri.edu), ORCID ID 0000-0002-3053-7269

25 LNM: [Lisa.Meihls@evogene.com](mailto:Lisa.Meihls@evogene.com), ORCID ID 0000-0002-1748-3315

26 MLG: [Michelle.Gregory@ars.usda.gov](mailto:Michelle.Gregory@ars.usda.gov), ORCID ID 0000-0002-1748-3315

27 DLF: [FinkeD@missouri.edu](mailto:FinkeD@missouri.edu), ORCID ID 0000-0001-8291-1964

28 TAC: [coudront@missouri.edu](mailto:coudront@missouri.edu), ORCID ID 0000-0002-9646-9705

29 BEH: [Bruce.Hibbard@ars.usda.gov](mailto:Bruce.Hibbard@ars.usda.gov), ORCID ID 0000-0001-8067-4416

30 KSS: [Kent.Shelby@ars.usda.gov](mailto:Kent.Shelby@ars.usda.gov), ORCID ID 0000-0001-9859-3497

31

### 32 **DATA AVAILABILITY STATEMENT**

33 All data are publicly available as Bioproject PRJNA422802, in the NCBI Sequence Read

34 Archive (SRA) database.

35

## Bacteriome of western corn rootworm life stages in different soils

### 36 **ABSTRACT**

37 Western corn rootworm (*Diabrotica virgifera virgifera* LeConte) is a serious pest of maize (*Zea*  
38 *mays* L.) in North America and parts of Europe. With most of its life cycle spent in the soil feeding  
39 on maize root tissues, this insect is likely to encounter and interact with a wide range of soil and  
40 rhizosphere microbes. Our knowledge of the role of microbes in pest management and plant health  
41 remains incomplete. An important component of an effective pest management strategy is to know  
42 which microorganisms are present that could play a role in life history or management. For this  
43 study, insects were reared in soils from different locations. Insects were sampled at each life stage  
44 to determine the possible core bacteriome. Additionally, soil was sampled at each life stage and  
45 resulting bacteria were identified to determine the contribution of soil to the rootworm bacteriome,  
46 if any. We analyzed the V4 hypervariable region of bacterial 16S rRNA genes with Illumina MiSeq  
47 to survey the different species of bacteria associated with the insects and the soils. The bacterial  
48 community associated with insects was significantly different from that in the soil. Some  
49 differences appear to exist between insects from non-diapausing and diapausing colonies while no  
50 significant differences in community composition existed between the insects reared on different  
51 soils. Despite differences in the bacteria present in immature stages and in male and female adults,  
52 there is a possible core bacteriome of approximately 16 operational taxonomic units (*i.e.*, present  
53 across all life stages). This research may give insights into how resistance to Bt develops, improved  
54 nutrition in artificial rearing systems, and new management strategies.

55 **Keywords:** *Diabrotica virgifera virgifera*, bacteria, maize, development, Coleoptera, rhizosphere,  
56 bacteriome.

57

## Bacteriome of western corn rootworm life stages in different soils

### 58 INTRODUCTION

59 Several studies have evaluated the microbial communities associated with lepidopteran  
60 pests and other insects that attack food crops (1-4). Interestingly, shifts in community  
61 composition or absence of bacteria can reduce the effectiveness of widely adopted management  
62 tactics such as crop rotation or maize expressing *Bacillus thuringiensis* Berliner (Bt) proteins.  
63 However, few studies have been conducted to document microbiomes within beetles attacking  
64 crops (5).

65 The western corn rootworm (*Diabrotica virgifera virgifera* LeConte, WCR) is a  
66 chrysomelid beetle whose larvae cause damage to maize root systems. While native to North  
67 America, this pest was introduced multiple times to Europe over 20 years ago (6) . Most recent  
68 estimates indicate this pest causes two billion dollars (USD) in yield loss and control costs  
69 worldwide annually (7, 8), and any regions growing maize should monitor for the presence or  
70 arrival of this species. Since its discovery as a pest of maize, the primary control tactic has been  
71 crop rotation (9). Recently, transgenic maize hybrids expressing insecticidal proteins from Bt  
72 have been used to reduce root damage and economic losses. However, both of these control  
73 strategies have instances of failure in the United States of America (10-15).

74 Neonate rootworm larvae (WCR and *D. barberi* Smith & Lawrence) burrow through the  
75 soil searching for maize root tissues, and then through maize roots while feeding on root tissue.  
76 Thus, larvae of these species are exposed to many species of bacteria and fungi in the soil and  
77 rhizosphere. The diversity of bacteria encountered is reflected on larval surfaces and digestive  
78 tracts. The microbiomes of larvae and later life stages may be assembled from bacterial and  
79 fungal species present during larval development in soil.

## Bacteriome of western corn rootworm life stages in different soils

80 Insect gut microbiomes are known to influence many aspects of insect growth, nutrition,  
81 reproduction, Bt resistance, and pathogen resistance (1, 16-22). Gut microbiota have been shown  
82 to affect the response of insects to Bt proteins in Lepidoptera (17, 20-22) and in mosquitoes (23),  
83 but this has not been investigated for Coleoptera. In the Old World bollworm (*Helicoverpa*  
84 *armigera* Hübner) the manipulation of the larval gut microbiota with antibiotics results in  
85 reduced susceptibility to a commercial formulation of Bt, as well as the purified  $\delta$ -endotoxins  
86 Cry1Ab and Cry1Ac (20). In general, the use of antibiotics to manipulate lepidopteran gut  
87 microbiota resulted in reduced mortality due to Bt proteins. Selection experiments with *H.*  
88 *armigera* on transgenic plants were also conducted in addition to manipulation of gut microbiota  
89 with antibiotics (22). When antibiotics were included, susceptibility to Bt was not altered with  
90 increasing generations of selection. However, selection in the absence of antibiotics (gut  
91 microbiota unaltered) resulted in a nearly 30% increase in larval survival by the F3 generation  
92 (22). Thus, resistance to Bt by *H. armigera* developed only when gut microbiota were present. In  
93 fact, the reduction in susceptibility to Bt with the addition of antibiotics was greater than the  
94 reduction of susceptibility to Bt due to three generations of selection when gut microbiota were  
95 present. Gut microbiota were also required for susceptibility of the gypsy moth, *Lymantria*  
96 *dispar* (L.), to Bt proteins (17).

97 Larval gut tissue of WCR has a diverse microbial community (18, 24). In WCR, a shift in  
98 gut microbiota enterotype was associated with increased resistance to soybean defense  
99 compounds, which may have contributed to the development of resistance to crop rotation (24).  
100 Comparison of gut microbiota between rotation-resistant WCR populations and wild-type WCR  
101 populations revealed shifts in the microbial community composition. Manipulation of WCR gut

## Bacteriome of western corn rootworm life stages in different soils

102 microbiota with antibiotics reduced the resistance to soybean defensive compounds to a level  
103 similar to that of wild- type WCR (24).

104 The contribution of gut microbiota to nutrition, physiology, and Bt resistance in WCR is  
105 unknown (18). Feeding of larval WCR on maize root tissue was shown to affect root rhizosphere  
106 microbiota composition, indicating a complex, multitrophic interaction (19) . Since gut  
107 microbiota play a role in Bt susceptibility in lepidopteran pests and a role in crop rotation  
108 resistance in WCR, it is reasonable to hypothesize that the microbiota of WCR can affect how  
109 larvae respond to Bt toxins expressed in maize. Consequently, a better understanding of which  
110 microbes are associated with WCR and how the insects acquire the microbiome is needed. In this  
111 study, we focused on the bacteriome. We compared the bacterial composition of WCR grown in  
112 two different soils, at each developmental stage, and alongside the soil from which the various  
113 life stages were collected and show that WCR larvae can carry particular species across all life  
114 stages (*i.e.*, a core bacteriome) regardless of the environment.

115

## 116 **RESULTS AND DISCUSSION**

117 We conducted the first survey of the bacteriome of WCR and the soil they are found in  
118 across all life stages. We investigated the effect of soil origin on the insect bacteriome because  
119 WCR occurs across a large region in many different soils throughout the United States of America  
120 and Europe. Soil was collected from Higginsville, MO, and the soil bacterial background from  
121 which insects emerged was compared to autoclaved soil from Columbia, MO. The results show  
122 that earlier life stages reared in soils from different locations contained a significantly different  
123 assemblage of bacterial species. However, as the insects matured, those differences declined and  
124 all life stages of the insects converged to a similar bacteriome.

## Bacteriome of western corn rootworm life stages in different soils

125 Sequencing of WCR and soil samples resulted in a mean ( $\pm$  SEM) of 66,759 ( $\pm$  3,895) and  
126 72,868 ( $\pm$  5,308) reads per sample, respectively. To account for the potential influence of  
127 differential coverage on downstream analyses, data were randomly subsampled to a uniform depth  
128 of 10,000 reads per sample and all subsequent analyses were performed on this rarefied dataset.

129 Annotated to the taxonomic level of class, the WCR samples were dominated by  
130 *Alphaproteobacteria* and *Gammaproteobacteria*, with lower and inconsistent relative abundance  
131 of *Actinobacteria*, *Cytophaga*, *Sphingobacteria*, *Betaproteobacteria*, and in the case of surface-  
132 sterilized eggs, *Flavobacteriia* and *Deltaproteobacteria* (Fig 1A). Soil samples demonstrated a  
133 seemingly more complex composition comprising a greater number of classes and a more even  
134 distribution (Fig 1B).

135 Microbial richness and diversity are often correlated with the health of an ecosystem, be  
136 it environmental or host-associated. Richness simply denotes the overall number of detected  
137 phylotypes in a sample, whereas Shannon and Simpson diversity indices integrate both the  
138 richness and evenness of the distribution of phylotypes in a sample. The underlying assumption  
139 is that increased numbers of different taxa and more even distributions of those taxa are  
140 representative of ecosystems fostering cross-feeding and syntrophic relationships among  
141 microbes. In contrast, low richness or asymmetrical distributions might represent an environment  
142 with high selective pressures or the presence of dominant taxa in a competitive environment.

143 Analyses of richness and diversity of bacterial communities in WCR and in the soil in  
144 which they were maintained revealed several interesting trends. To first determine whether the  
145 site of soil origin influenced richness, Shannon diversity index, or Simpson diversity index of  
146 WCR bacteria, a two-way ANOVA was performed with soil site (*i.e.*, Columbia or Higginsville)  
147 and insect life-stage as fixed variables. Significant main effects of WCR life-stage were detected

## Bacteriome of western corn rootworm life stages in different soils

148 for richness ( $p < 0.001$ ,  $F = 8.14$ ), Shannon index ( $p = 0.011$ ,  $F = 3.48$ ), and Simpson index ( $p <$   
149  $0.001$ ,  $F = 5.78$ ). No differences were detected between soil sites for richness, Shannon index, or  
150 Simpson index of WCR-associated bacteria ( $p = 0.338$ ,  $0.072$ , and  $0.244$ , respectively). Of note  
151 however, similar testing of the soil communities from each site revealed significant site-  
152 dependent differences in richness, Shannon index, and Simpson index ( $p < 0.001$  for all three  
153 metrics,  $F = 38.52$ ,  $197.64$ , and  $25.04$ , respectively). No life-stage-dependent differences in  
154 bacterial richness were detected between the two soil sites, although diversity within soil did  
155 significantly vary among life-stages ( $p = 0.030$ ,  $F = 2.88$  and  $p < 0.001$ ,  $F = 5.53$  for Shannon  
156 and Simpson indices, respectively).

157 Collectively, we interpret these data as evidence that the environment has a limited effect  
158 on the relative uniformity and richness of the WCR bacteriome. This hypothesis is supported by  
159 the nearly log-fold difference in richness between soil and rootworm samples. The fact that no  
160 soil-dependent differences were detected in the bacteriome of rootworms themselves, despite the  
161 stark differences in the bacterial richness of their respective environments, stands in contrast to  
162 the life-stage-dependent differences in richness observed only in the rootworms and not in the  
163 soil samples.

164 Considering WCR samples from the two soils collectively, there was a general trend  
165 toward increasing richness in each successive life-stage from egg to pupa followed by a  
166 precipitous decline during the pupal molt to adulthood (Fig 2A). Pairwise comparisons of  
167 richness between life-stages detected significantly decreased richness of phylotypes in adult  
168 WCR relative to several earlier life-stages. Interestingly, an inverse trend was observed in the  
169 richness of bacteria in soil samples across life-stages (Fig 2B). In contrast, diversity as assessed  
170 via the Simpson index, was higher in sterilized eggs relative to other life-stages while diversity in

## Bacteriome of western corn rootworm life stages in different soils

171 adult rootworms was much lower (S1A Fig), likely reflecting the increasingly skewed bacterial  
172 community structure as the rootworms mature. No life-stage-dependent differences were  
173 detected in the diversity of the soil bacterial community (S1B Fig).

174 In order to provide a more comprehensive comparison of the bacterial communities  
175 present in each sample, incorporating not just the number but also the identities of shared and  
176 unique taxa, principal coordinate analysis (PCoA) and permutational multivariate analyses of  
177 variance (PERMANOVA) were performed to visualize and statistically test for differences in  
178 community structure, respectively. With both methods, the similarity of any given pair of  
179 samples can be determined several different ways. To ensure that any differences detected were  
180 robust and to determine the nature of detected differences, we compared samples using both the  
181 Bray-Curtis and Jaccard similarity indices. While the Jaccard index is relatively unweighted and  
182 determines sample similarity based on the shared presence or absence of taxa, the Bray-Curtis  
183 index is weighted to also incorporate the relative abundance of any shared taxa.

184 Regardless of the index used, robust compositional differences were detected among all  
185 groups with the exception of the WCR samples reared in soil from different sites, again  
186 suggesting selection for a specific bacterial community within the rootworms. Specifically,  
187 testing for differences using the Bray-Curtis distances detected significant compositional  
188 differences between all pairwise comparisons except between WCR samples reared in different  
189 soil (Table 1). Accordingly, PCoA demonstrated a clear separation of soil and WCR samples  
190 along PC1 (38.1% of the total variation in the dataset), complete separation of soil communities  
191 from the two soil sites along PC2, and partial overlap between WCR communities (Fig 3).  
192 Testing based on the Jaccard index found significant differences between all pairwise  
193 comparisons. Ordination resulted in a similar pattern and the F value generated from the



## Bacteriome of western corn rootworm life stages in different soils

194 comparison of WCR reared on soil from the two sites was extremely low relative to the other  
195 comparisons, despite having the highest total number of samples included in the comparison  
196 (Table 2). Collectively, these data complement the analyses of richness and diversity in  
197 supporting the hypothesis that WCR select for a limited subset of host-associated bacteria,  
198 largely irrespective of their environment.

199 Annotated to the level of operational taxonomic unit (*i.e.*, the best taxonomic resolution  
200 afforded by the 16S rRNA amplicons), the bacterial composition of the adult WCR was  
201 incredibly sparse. Of the 474 operational taxonomic units (OTUs) detected in anywhere from one  
202 of 18 (5.6%) to 15 of 18 (83.3%) of the adult rootworms, the mean relative abundance was  
203 uniformly below 0.3% (S2 Fig). Conversely, the 13 OTUs detected in 16 or greater of the 18  
204 adult rootworms were present at a mean relative abundance of greater than 1.5%. Notably, 95.4%  
205 of the bacterial DNA recovered from adult rootworms was annotated to three OTUs: *Wolbachia*  
206 sp. ( $85.5 \pm 24.0\%$  in 18 of 18 adults), unclassified family *Enterobacteriaceae* ( $6.2 \pm 13.0\%$  in 16  
207 of 18 adults), and *Acinetobacter* sp. ( $4.7 \pm 11.6\%$  in 17 of 18 adults).

208 To determine whether inherent differences exist in the bacteriome of WCR based on  
209 genetic background, insects from a colony of wild-type WCR that undergo diapause and an  
210 experimental non-diapausing WCR laboratory colony were reared to each life stage in autoclaved  
211 soil from Columbia, MO, as previously mentioned. All life stages and corresponding soil samples  
212 were collected and processed to extract and purify DNA. The V4 region of the 16S ribosomal gene  
213 was amplified and sequenced to putatively identify bacteria.

214 Once the identities of the bacteria were determined, we compared the bacteriomes between  
215 the two colonies using PERMANOVA with Bray-Curtis and Jaccard indices. The two indices  
216 revealed different patterns. No significant differences were detected between these colonies with

## Bacteriome of western corn rootworm life stages in different soils

217 the Bray-Curtis index ( $p=0.10$ ;  $F=1.90$ ), indicating that insects that do not undergo diapause retain  
218 a similar bacteriome as insects that do undergo diapause despite hundreds of generations of  
219 laboratory selection. However, PERMANOVA with a Jaccard index revealed significant  
220 differences in bacterial communities between insects from a diapausing colony and those from a  
221 non-diapausing colony ( $p=0.0001$ ;  $F=2.90$ ; Fig 4). Insects from both colonies appear to share many  
222 dominant taxa while rarer species appear to be isolated to individual colonies.

223 Exploratory studies documenting the bacterial communities in different organisms may  
224 lead to new insights as to the role(s) they may fill or even new management tactics. Over 2,200  
225 unique operational taxonomic units (OTUs) were putatively identified in soil and insect samples  
226 from both colonies and soils. Our study documented more than 1,100 OTUs present throughout  
227 the WCR life cycle. Of these OTUs, 16 were found in every life stage of insects regardless of the  
228 colony or rearing soil. We speculate that these 16 OTUs comprise the core bacteriome for WCR.  
229 Furthermore, some of these bacteria were never found in the soil suggesting vertical transmission  
230 (*i.e.*, parent to progeny) of bacteria is the most likely mechanism for at least some of the WCR  
231 bacteriome (Table 3).

232 Many OTUs were discovered in the sterilized eggs of insects from the diapausing  
233 colony. However, we cannot be certain whether these bacteria were alive inside the egg or dead  
234 on the surface of the egg shell. Given the sculpturing of the chorion, it is possible dead bacteria  
235 remained on the surface served as a source of non-viable DNA (19, 25). The protocol we used  
236 does not discern between live and dead bacteria. If the bacteria were alive, then it is possible the  
237 eggs serve as a source of bacteria that colonize the neonatal gut. There is evidence that some of  
238 the bacteria are passed from parents to offspring (Table 3), but we cannot be certain without  
239 additional studies. Future experiments should extract rRNA and generate cDNA before sequencing

## Bacteriome of western corn rootworm life stages in different soils

240 the resulting strands. This method would reduce the likelihood of dead bacterial sequences entering  
241 the analysis as RNA degrades rapidly while DNA can persist for many years.

242 We infer that some of these bacteria may be endosymbionts of WCR as particular OTUs  
243 never appeared outside of insect samples (Table 3). However, we used laboratory colonies to  
244 make inferences about wild-type populations. In theory, the differences between wild-type  
245 populations and laboratory colonies should be minimal. In reality, we simply do not know. The  
246 geographic distribution of this insect encompasses most of the United States of America and  
247 parts of Europe. The soils across these regions are also diverse as are the management tactics  
248 employed by farmers. It stands to reason that the bacterial communities are different within and  
249 between fields. Future studies will need to include more samples, samples from different  
250 locations across the Corn Belt and other regions, and wild-type specimens to validate or  
251 invalidate the findings of this research.

252 WCR continues to evolve and adapt to the different management tactics that maize  
253 growers are implementing now. Future technologies for pest control, including RNA  
254 interference, are still years away from field implementation. New tools and knowledge are  
255 needed to combat this pest. This study documents the plethora of bacteria encountered by WCR  
256 in different soils and identifies a small core bacteriome retained by WCR. Clearly, there is much  
257 to learn about the functions of these different bacteria with regards to WCR.

258

## 259 MATERIALS AND METHODS

260 **Insect rearing.** Eggs from non-diapausing and diapausing colonies of WCR were  
261 obtained from the Agricultural Research Service of the United States Department of Agriculture  
262 (USDA-ARS). The non-diapausing colony was derived from the primary non-diapausing colony

## Bacteriome of western corn rootworm life stages in different soils

263 held at Brookings, SD (26). The diapausing colony eggs were from the primary diapausing  
264 colony (27) also held at Brookings, SD, and remained in cold storage until needed.

265 For the non-diapausing colony maintained in Columbia, MO, adults of both sexes were  
266 placed in cages (30×30×30 cm, Megaview Science Co., Ltd., Taichung, Taiwan) with a  
267 photoperiod of 14:10 (L:D) h at 25 °C. Adults were supplied with corn leaf tissue, slices of  
268 zucchini, an agar gel to serve as a water source, and an artificial diet for adult rearing (Frontier  
269 Agricultural Sciences, Newark, DE). Petri dishes with 70 mesh sieved field soil from Columbia,  
270 MO, served as an oviposition site for females. The oviposition site was moistened throughout the  
271 week and replaced weekly. The eggs in the Petri dish were separated from the soil by washing  
272 through a 60 mesh sieve. The eggs were then divided and placed in two plastic containers (15 ×  
273 10 cm, GladWare®, The Glad Products Company, Oakland, CA) with 70 mesh sieved Columbia,  
274 MO, field soil. The plastic containers were covered with lids and placed on the bottom racks of a  
275 Percival incubator set to run at 25 °C.

### 276 **Seedling Mats**

277 **Insects from non-diapausing colony.** Fifteen seedling mats were planted in March  
278 2016. Each seedling mat contained approximately 15 g of maize seed (Monsanto Company,  
279 variety DKC 61-79), 6 cm of autoclaved growth medium, and 80 ml of tap water in a 15 × 10 cm  
280 plastic container. The growth medium consisted of a mixture of field soil:Pro-Mix BX potting  
281 medium (Premier Horticulture Inc., Quakertown, PA) at a 2:1 ratio (v/v) prior to being  
282 autoclaved. Seedling mats were allowed to germinate, and coleoptiles emerged through the soil  
283 surface prior to infestation.

284 Seedling mat containers were placed on the top rack of the same Percival incubator in  
285 which eggs were incubated. Data were collected at six time points: 0 d (neonate larvae), 5 d, 10

## Bacteriome of western corn rootworm life stages in different soils

286 d, 15 d, 22 d, and adult emergence. Three replicates of each time point were used for this survey.  
287 Seedling mats in each replicate were randomly assigned a time point with each seedling mat  
288 receiving 25 neonate larvae. The 0 d time point did not require insect feeding and so for this  
289 treatment, rather than using seedling mats, 10 neonate larvae were collected directly into 1.5ml  
290 microcentrifuge tubes (USA Scientific) and then stored at -80 °C (So-Low, Environmental  
291 Equipment, Cincinnati, OH).

292 For the adult emergence time point in this survey, we planted new maize seeds into a  
293 larger container (33 × 19 cm, Sterilite Corporation, Birmingham, AL) and allowed the maize to  
294 grow for one week prior to infestation. The first and smaller seedling mat had plant tissue  
295 removed before being inverted onto the second and larger seedling mat containing soil from the  
296 same site. After one week, the larger seedling mat was covered with a mesh screen to prevent  
297 escape of emerging adults.

298 **Insects from a diapausing colony.** A total of five replications were conducted for this  
299 survey. During this survey, two different growth media were used. The first growth medium  
300 remained the same as the previous insect survey, while the second growth media was soil  
301 collected from a continuous corn field in Higginsville, MO, in July 2016. This soil was not  
302 autoclaved and remained enclosed in a metal container until use in October 2016. In addition to  
303 the time points listed previously, two types of eggs were sampled: eggs washed from sieved soil,  
304 and eggs washed from sieved soil that were then surface sterilized (28).

305 Once the desired time point was reached, the seedling mats were processed in the same  
306 manner as (29). For the 5, 10, 15, and 22 d time points, all aboveground plant material was  
307 removed from the container. Next, the soil and root tissue were placed into a Berlese funnel with  
308 an attached jar. The jar with a moist filter paper at the bottom was used to collect the larvae.

## Bacteriome of western corn rootworm life stages in different soils

309 Specimens of each age were transferred from the jar to a microcentrifuge tube at least once every  
310 three hours throughout a typical work day. This tube was then immediately placed into the -80  
311 °C freezer for storage until DNA extraction occurred. A new tube was used for each collection  
312 time and sample to prevent additional freezing and thawing. During time points when larvae  
313 were sampled, soil was also collected from the bottom of the seedling mat prior to drying.

314 No secondary container was used for the diapausing insect survey, but mesh screens were  
315 used to keep the adults from escaping the container. Adult emergence containers were checked  
316 daily, and adults from each container on a given day were placed into microcentrifuge tubes. Soil  
317 was collected from the soil surface where adults must pass to emerge through the soil.

318 **DNA Extraction and Quantification.** Whole insects (1-8 larvae/treatment; 1-2  
319 pupae/treatment; a single adult/treatment) were pooled, and DNA extracted using accepted  
320 methods (30). The samples were extracted using PowerFecal® DNA Isolation Kit (MO BIO  
321 Laboratories, Inc. Catalog No. 12830-50) following the manufacturer's protocol  
322 (<https://mobio.com/media/wysiwyg/pdfs/protocols/12830.pdf>) with the following modifications:  
323 one sterile 0.5 cm diameter stainless steel ball bearing was added to the Dry Bead Tube for each  
324 adult and soil sample prior to shaking; shaking time was reduced to 5 minutes for adults and 3  
325 minutes for all other samples. DNA quality and concentration was determined for each sample  
326 by Nanodrop 2000 Spectrophotometer (Thermo Scientific, Wilmington, DE) and stored at  
327 -80°C.

328 **Library construction and sequencing.** All PCR and sequencing was performed at the  
329 University of Missouri DNA Core. DNA concentration was determined fluorometrically (Qubit  
330 2.0, Life Technologies) prior to analysis. Based on results of fluorometry, all samples were  
331 normalized to a standard concentration for PCR amplification. Bacterial 16S rRNA amplicons

## Bacteriome of western corn rootworm life stages in different soils

332 were generated via amplification of the V4 hypervariable region of the 16S rRNA gene using  
333 single-indexed universal primers (U515F/806R) flanked by Illumina standard adapter sequences  
334 and the following parameters:  $98^{\circ}\text{C}^{(3:00)} + [98^{\circ}\text{C}^{(0:15)} + 50^{\circ}\text{C}^{(0:30)} + 72^{\circ}\text{C}^{(0:30)}] \times 25 \text{ cycles} + 72^{\circ}\text{C}^{(7:00)}$ .  
335 Amplicons were then pooled for sequencing using the Illumina MiSeq platform and V2  
336 chemistry with  $2 \times 250$  bp paired-end reads, as previously described (31).

337 **Informatics analysis.** All informatics analyses were performed as previously described  
338 (32), at the University of Missouri Informatics Research Core Facility. Input is typically for  
339  $2 \times 350$  bp reads from one of the two MiSeq machines in the DNA Core. The read pairs are joined  
340 into contigs by the program FLASH  
341 (<http://bioinformatics.oxfordjournals.org/content/27/21/2957.long>) (33), and culled if found to be  
342 short after trimming for a base quality less than 31, and those that are not joined, or are too long  
343 or short after contig formation, leaving those that are 275 to 300 nts. Cutadapt  
344 (<http://journal.embnet.org/index.php/embnetjournal/article/view/200/479>) was used to find and  
345 trim the primers from the 5' and the 3' ends, culling those contigs lacking both primers. Contigs  
346 with the expected number of errors greater than 0.5 were removed by Usearch  
347 (<http://drive5.com/index.htm>), and the remainder were trimmed to length 248. The contig read  
348 ids were modified so that samples could be followed throughout by using the Qiime script  
349 `split_libraries_fastq.py`. All samples were then pooled into one FASTA file and metrics for all  
350 samples collated into one table. Contigs were clustered *de novo* into an OTU table using the  
351 `uparse` (<http://drive5.com/uparse/>) algorithm. *De novo* and reference-based chimera detection and  
352 removal was performed using Qiime v1.8 (34) software, and remaining contiguous sequences  
353 were assigned to operational taxonomic units (OTUs) via *de novo* OTU clustering and a criterion  
354 of 97% nucleotide identity. Annotation of selected OTUs was performed using BLAST (35)

## Bacteriome of western corn rootworm life stages in different soils

355 against the Silva database (<https://www.arb-silva.de/>) (36) of 16S rRNA sequences and  
356 taxonomy. Principal coordinate analysis and PERMANOVA testing were performed using  $\frac{1}{4}$   
357 root-transformed and non-transformed OTU relative abundance data, respectively, using Past  
358 3.16 (<https://folk.uio.no/ohammer/past/>) (37). Richness, Shannon diversity index, and Simpson  
359 diversity metrics were determined in Past 3.16 using Qiime-generated `otu_biom.table` files.

360 **Statistical analysis.** Differences in raw and binned OTU richness were tested via  
361 ANOVA using SigmaPlot 12.3 (Systat Software Inc., San Jose, CA); *p* values less than 0.05  
362 were considered significant. Differences in the overall composition of the different regions were  
363 tested via two- and one-way PERMANOVA of ranked Bray-Curtis or Jaccard distances using  
364 the open access Past 3.16 software package (38), downloaded on April 2, 2016.

365

## 366 ACKNOWLEDGEMENTS

367 Sequencing services were performed at the University of Missouri DNA Core Facility by Nathan  
368 Bivens and Karen Bromert. We thank Bill Spollen and Christopher Bottoms (University of  
369 Missouri Informatics Core), Rebecca Dorfmeier and Giedre Turner (University of Missouri  
370 Metagenomics Center), and Karen Clifford (University of Missouri College of Veterinary  
371 Medicine), Julie Barry (USDA-ARS) for insect rearing, Adriano Pereira for assistance with  
372 collecting insects, and Chad Nielson and Wade French (USDA-ARS) for maintaining colonies  
373 used in this study. Mention of trade names or commercial products in this publication is solely  
374 for the purpose of providing specific information and does not imply recommendation or  
375 endorsement by the U.S. Department of Agriculture (USDA). USDA is an equal opportunity  
376 provider and employer.

377



## Bacteriome of western corn rootworm life stages in different soils

### 378 **COMPETING INTERESTS**

379 The authors declare no competing interests.

380

### 381 **FINANCIAL DISCLOSURE**

382 Funding was provided by Syngenta Biotechnology through Cooperative Research and  
383 Development Award No. 58-3K95-4-1697 to USDA-ARS. Funding was also provided by the  
384 University of Missouri's Division of Plant Science for DCL's salary.

385

### 386 **AUTHOR CONTRIBUTIONS**

387 B.E.H., L.N.M., T.A.C., and K.S.S. secured funding for the project; D.C.L., L.N.M., T.A.C.,  
388 B.E.H. and K.S.S. conceived and designed the experiments; D.C.L., L.N.M., M.L.G., and A.C.E.  
389 performed the experiments; A.C.E., D.C.L. and K.S.S. analyzed the data; D.C.L., L.N.M., A.C.  
390 E. and K.S.S. contributed reagents/materials/analysis tools; and D.C.L., L.N.M., M.L.G, A.C.E.,  
391 D.L.F., T.A.C., B.E.H., and K.S.S. wrote the paper. All authors read and approved the final  
392 version.

393

Bacteriome of western corn rootworm life stages in different soils

394 **TABLES**

395 **Table 1.** Results of PERMANOVA testing for differences in  $\beta$ -diversity between western corn  
396 rootworm (WCR) and soil samples collected from two different sites, based on the Bray-Curtis  
397 distance. *p* values and F values are shown in the upper right and lower left portions of the table,  
398 respectively.

|                      |              | <i>p</i> values |  | Soil origin |              | WCR from “X” soil |              |
|----------------------|--------------|-----------------|--|-------------|--------------|-------------------|--------------|
|                      |              | F values        |  | Columbia    | Higginsville | Columbia          | Higginsville |
| Soil origin          | Columbia     |                 |  | 0.0001      | 0.0001       | 0.0001            | 0.0001       |
|                      | Higginsville | 27.62           |  |             | 0.0001       | 0.0001            | 0.0001       |
| WCR from<br>“X” soil | Columbia     | 57.08           |  | 104.5       |              | 0.1498            |              |
|                      | Higginsville | 38.43           |  | 119.7       |              | 1.657             |              |

399

Bacteriome of western corn rootworm life stages in different soils

400 **Table 2.** Results of PERMANOVA testing for differences in  $\beta$ -diversity between western corn  
 401 rootworm (WCR) and soil samples collected from two different sites, based on the Jaccard  
 402 distance.  $p$  values and F values are shown in the upper right and lower left portions of the table,  
 403 respectively.

|                   |              | $p$ values |          | Soil Origin  |          | WCR from "X" soil |  |
|-------------------|--------------|------------|----------|--------------|----------|-------------------|--|
|                   |              | F values   | Columbia | Higginsville | Columbia | Higginsville      |  |
| Soil Origin       | Columbia     |            |          | 0.0001       | 0.0001   | 0.0001            |  |
|                   | Higginsville | 24.93      |          |              | 0.0001   | 0.0001            |  |
| WCR from "X" soil | Columbia     | 19.62      | 23.66    |              |          | 0.0001            |  |
|                   | Higginsville | 18.56      | 18.6     |              | 3.972    |                   |  |

404

Bacteriome of western corn rootworm life stages in different soils

405 **Table 3.** Unique operational taxonomic units (OTUs) found in all insect samples regardless of  
406 soil origin.

| OTUs                                | Taxonomic Rank | Present in egg soil? <sup>1</sup> | First found in soil <sup>2</sup> |
|-------------------------------------|----------------|-----------------------------------|----------------------------------|
| Ruminococcaceae                     | Family         | Yes                               | Egg                              |
| Lachnospiraceae                     | Family         | Yes                               | Egg                              |
| Bacteroidales S24-7                 | Group          | Yes                               | Egg                              |
| <i>Wolbachia (Delia antiqua)</i>    | Genus          | No                                | Neonate                          |
| <i>Tsukamurella</i> sp.             | Genus          | No                                | Never                            |
| <i>Gordonia</i> sp.                 | Genus          | Yes                               | Egg                              |
| <i>Oscillibacter</i> sp.            | Genus          | Yes                               | Egg                              |
| <i>Microbacterium</i> sp.           | Genus          | Yes                               | Egg                              |
| <i>Bacillus megaterium</i>          | Species        | No                                | Never                            |
| <i>Geobacillus toebii</i>           | Species        | Yes                               | Egg                              |
| <i>Klebsiella</i> sp. Z1            | Species        | Yes                               | Egg                              |
| <i>Mycobacterium fortuitum</i>      | Species        | No                                | Never                            |
| <i>Streptomyces rectiviolaceus</i>  | Species        | No                                | Never                            |
| Lachnospiraceae NK4A136             | Species        | Yes                               | Egg                              |
| <i>Pseudomonas</i> sp. FSGRN7       | Species        | No                                | Never                            |
| <i>Pseudonocardia</i> sp. YIM 68245 | Species        | No                                | Never                            |

407 <sup>1</sup>Were the OTUs found in the soil in which eggs were incubated and neonates emerged?

408 <sup>2</sup>If these OTUs were found in insect samples, then which insect life stage were these OTUs  
409 first detected?

## Bacteriome of western corn rootworm life stages in different soils

### 410 **FIGURE LEGENDS**

411 **Fig 1.** Stacked bar charts showing relative abundances of bacterial classes detected in corn  
412 rootworms at different life stages (A) and in soil from which rootworm samples were collected  
413 (B). Horizontal bars below the vertical bars indicate original of soil; black bars = Columbia, MO,  
414 white bars = Higginsville, MO.

415

416 **Fig 2.** Main effect of life stage on bacterial richness in western corn rootworm (A,  $p < 0.001$ ), or  
417 the soil from which WCR samples were collected (B,  $p = 0.040$ ). Significant pairwise differences  
418 are indicated by like letters (Kruskal-Wallis one-way ANOVA on ranks with Dunn's *post hoc*).

419

420 **Fig 3.** Principal coordinate analysis based on Bray-Curtis similarity between bacterial  
421 communities detected in western corn rootworm (WCR) at various life stages and soil samples  
422 collected from two different sites.

423

424 **Fig 4.** Principal coordinate analysis based on Bray-Curtis similarity between bacterial  
425 communities detected in western corn rootworm (WCR) from diapausing and non-diapausing  
426 colonies including all life stages, except sterilized ova.

427

428 **S1 Fig.** Main effect of life stage on mean Shannon and Simpson diversity indices in western corn  
429 rootworms (A,  $p < 0.001$ ), or the soil from which the WCR samples were collected (B,  $p =$   
430  $0.040$ ). Significant pairwise differences indicated like letters (Kruskal-Wallis one-way ANOVA  
431 on ranks with Dunn's *post hoc*).

432

433 **S2 Fig.** Principal coordinate analysis based on Jaccard similarity between bacterial communities  
434 detected in western corn rootworms (WCR) at various life stages and soil samples collected from  
435 two different sites.

436

437 **S3 Fig.** Number and mean relative abundance (above bars) of operational taxonomic units  
438 (OTUs) detected at increasing prevalence in adult western corn rootworm samples.

## Bacteriome of western corn rootworm life stages in different soils

### 439 SUPPORTING INFORMATION

440

### 441 REFERENCES

- 442 1. Caccia S, Di Lelio I, La Stora A, Marinelli A, Varricchio P, Franzetti E, et al. Midgut  
443 microbiota and host immunocompetence underlie *Bacillus thuringiensis* killing mechanism.  
444 Proceedings of the National Academy of Science USA 2016;113(34):9486–91.
- 445 2. Dhammi A, van Krestchmar JB, Ponnusamy L, Bachelier JS, Reisig DD, Herbert A, et al.  
446 Biology, pest status, microbiome and control of kudzu bug (Hemiptera: Heteroptera:  
447 Plataspidae): a new invasive pest in the U.S. International journal of molecular sciences.  
448 2016;17(9):1570.
- 449 3. Hadapad AB, Prabhakar C, S. , Chandekar SC, Tripathi J, Hire RS. Diversity of bacterial  
450 communities in the midgut of *Bactrocera cucurbitae* (Diptera: Tephritidae) populations and  
451 their potential use as attractants. Pest Management Science 2016;72:1222-30.
- 452 4. Snyman M, Gupta AK, Bezuindenhout C, Claasens S, van den Berg J. Gut microbiota of  
453 *Busseola fusca* (Lepidoptera: Noctuidae). World Journal of Microbiology and Biotechnology.  
454 2016;32:115.
- 455 5. Perlatti B, Luiz AL, Prieto EL, Fernandes JB, das Graças Fernandes da Silva MF, Ferreira D,  
456 et al. MALDI-TOF MS identification of microbiota associated with pest insect *Diabrotica*  
457 *speciosa*. Agricultural and Forest Entomology. 2017;19:408-17.
- 458 6. Miller N, Estoup A, Toepfer S, Bourguet D, Lapchin L, Derridj S, et al. Multiple  
459 transatlantic introductions of the western corn rootworm. Science. 2005;310(5750):992.
- 460 7. Metcalf RJ. Foreword. Methods for the Study of Pest *Diabrotica*. New York, NY USA:  
461 Springer-Verlag; 1986. p. vii–xv.
- 462 8. Mitchell P. Cost and benefits of controlling pest *Diabrotica* in maize in the United States.  
463 24th IWGO Conference; 24–26 Oct. 2011; Freiburg, Germany.
- 464 9. Gillette CP. *Diabrotica virgifera* LeC as a corn root-worm. Journal of Economic  
465 Entomology. 1912;5:3.
- 466 10. Levine E, Spencer JL, Isard SA, Onstad DW, Gray ME. Adaptation of the western corn  
467 rootworm to crop rotation: evolution of a new strain in response to a management practice.  
468 American Entomologist. 2002;48:94-107.
- 469 11. Gassmann AJ, Petzold-Maxwell JL, Keweshan RS, Dunbar MW. Field-evolved resistance  
470 to Bt maize by western corn rootworm. PLoS One. 2011;6(7):e22629.
- 471 12. Gassmann AJ, Petzold-Maxwell JL, Clifton EH, Dunbar MW, Hoffmann AM, Ingber DA, et  
472 al. Field-evolved resistance by western corn rootworm to multiple *Bacillus thuringiensis* toxins  
473 in transgenic maize. Proceedings of the National Academy of Science USA. 2014;111(14):5141-  
474 6.
- 475 13. Gassmann AJ, Shrestha RB, Jakka SR, Dunbar MW, Clifton EH, Paolino AR, et al. Evidence  
476 of resistance to Cry34/35Ab1 corn by western corn rootworm (Coleoptera: Chrysomelidae):  
477 Root injury in the field and larval survival in plant-based bioassays. Journal of Economic  
478 Entomology. 2016.

## Bacteriome of western corn rootworm life stages in different soils

- 479 14. Zukoff SN, Ostlie KR, Potter B, Meihls LN, Zukoff AL, French L, et al. Multiple assays  
480 indicate varying levels of cross resistance in Cry3Bb1-selected field populations of the western  
481 corn rootworm to mCry3A, eCry3.1Ab, and Cry34/35Ab1. *Journal of Economic Entomology*.  
482 2016;109:1387–98.
- 483 15. Ludwick, D.C. , Meihls LN, Ostlie KR, Potter BD, French L, Hibbard BE. Minnesota field  
484 population of western corn rootworm (Coleoptera: Chrysomelidae) shows incomplete  
485 resistance to Cry34/35Ab1 and Cry3Bb1. *Journal of Applied Entomology*. 2017;141:28-40.
- 486 16. Douglas AE. Nutritional interactions in insect-microbial symbioses: aphids and their  
487 symbiotic bacteria Buchnera. *Annual Review of Entomology*. 1998;43:17-37.
- 488 17. Broderick NA, Raffa KF, Handelsman J. Midgut bacteria required for *Bacillus*  
489 *thuringiensis* insecticidal activity. *Proceedings of the National Academy of Sciences USA*.  
490 2006;103:15196-9.
- 491 18. Dematheis F, Kurtz B, Vidal S, Smalla K. Microbial communities associated with the larval  
492 gut and eggs of the western corn rootworm. *PLoS One*. 2012;7(e44685):e44685.
- 493 19. Dematheis F, Zimmerling U, Flocco C, Kurtz B, Vidal S, Kropf S, et al. Multitrophic  
494 interaction in the rhizosphere of maize: Root feeding of western corn rootworm larvae alters  
495 the microbial community composition. *PLOS One*. 2012;5(e37228):e37228.
- 496 20. Paramasiva I, Sharma HC, Krishnappa PV. Antibiotics influence the toxicity of the  $\delta$ -  
497 endotoxins of *Bacillus thuringiensis* towards the cotton bollworm, *Helicoverpa armigera*. *BMC*  
498 *Microbiology*. 2014;14:200.
- 499 21. Paramasiva I, Shouche Y, Kulkarni GJ, Krishnappa PV, Akbar SM, Sharma HC. Diversity in  
500 gut microflora of *Helicoverpa armigera* populations from different regions in relation to  
501 biological activity of *Bacillus thuringiensis* delta-endotoxin Cry1Ac. *Archives of Insect*  
502 *Biochememistry and Physiology*. 2014;87(4):201-13.
- 503 22. Visweshwar R, Sharma HC, Akbar SMD, Sreeramulu K. Elimination of gut microbes with  
504 antibiotics confers resistance to *Bacillus thuringiensis* toxin proteins in *Helicoverpa armigera*  
505 (Hubner). *Applied Biochememistry and Biotechnology*. 2015;177:1621-37.
- 506 23. Patil CD, Borase HP, Salunke BK, Patil SV. Alteration in *Bacillus thuringiensis* toxicity by  
507 curing gut flora: novel approach for mosquito resistance management. *Parasitology Research*.  
508 2013;112(9):3283-8.
- 509 24. Chu CC, Spencer JL, Curzi MJ, Zavala JA, Seufferheld MJ. Gut bacteria facilitate  
510 adaptation to crop rotation in the western corn rootworm. *Proceedings of the National*  
511 *Academy of Science USA*. 2013;110(29):11917-22.
- 512 25. Krysan J. Introduction: biology, distribution, and identification of pest *Diabrotica*. In:  
513 Krysan JL, Miller TA, editors. *Methods for the Study of Pest Diabrotica*: Springer-Verlag; 1986. p.  
514 1-23.
- 515 26. Branson TF. Viability and hatching pattern of eggs of the western corn rootworm  
516 exposed to chill periods of different durations. *Entomologia Experimentalis et Applicata*.  
517 1976;19:77-81.
- 518 27. Jackson J. Rearing and handling of *Diabrotica virgifera virgifera* and *Diabrotica*  
519 *undecimpunctata howardi*. *Methods for the study of pest Diabrotica*: Springer-Verlag, New  
520 York, USA; 1986. p. 25–47.

## Bacteriome of western corn rootworm life stages in different soils

- 521 28. Pleau MJ, Huesing JE, Head GP, Feir DJ. Development of an artificial diet for the western  
522 corn rootworm. *Entomologia Experimentalis et Applicata*. 2002;105:1-11.
- 523 29. Meihls LN, Higdon ML, Siegfried BD, Miller NJ, Sappington TW, Ellersieck MR, et al.  
524 Increased survival of western corn rootworm on transgenic corn within three generations of on-  
525 plant greenhouse selection. *Proceedings of the National Academy of Science USA*.  
526 2008;105(49):19177–82.
- 527 30. Chen H, Rangasamy M, Tan SY, Wang HC, Siegfried BD. Evaluation of Five Methods for  
528 Total DNA Extraction from Western Corn Rootworm Beetles. *PLoS ONE*. 2010;5(8).
- 529 31. Ericsson AC, Davis JW, Spollen W, Bivens N, Givan S, Hagan CE, et al. Effects of vendor  
530 and genetic background on the composition of the fecal microbiota of inbred mice. *PLoS One*.  
531 2015;10(2):e0116704.
- 532 32. Hart ML, Meyer A, Johnson PJ, Ericsson AC. Comparative Evaluation of DNA Extraction  
533 Methods from Feces of Multiple Host Species for Downstream Next-Generation Sequencing.  
534 *PLoS One*. 2015;10(11):e0143334.
- 535 33. Magoc T, Salzberg SL. FLASH: fast length adjustment of short reads to improve genome  
536 assemblies. *Bioinformatics* 27:2957-2963. *Bioinformatics*. 2011;27:2957-63.
- 537 34. Kuczynski J, Stombaugh J, Walters WA, González A, Caporaso JG, Knight R. Using QIIME  
538 to analyze 16S rRNA gene sequences from microbial communities. *Current Protocols in*  
539 *Microbiology*. 2012;27:1E.5.1-E.5.20.
- 540 35. Altschul SF, Madden TL, Schaffer AA, Zhang J, Zhang Z, Miller W, et al. Gapped BLAST  
541 and PSI-BLAST: a new generation of protein database search programs. *Nucleic Acids Research*.  
542 1997;25:3389-402.
- 543 36. DeSantis TZ, Hugenholtz P, Larsen N, Rojas M, Brodie EL, Keller K, et al. Greengenes, a  
544 chimera-checked 16S rRNA gene database and workbench compatible with ARB. *Applied and*  
545 *Environmental Microbiology*. 2006;72(7):5069-72.
- 546 37. Hammer Ø, Harper DAT, Ryan PD. PAST: Paleontological statistics software package for  
547 education and data analysis. *Palaeontol Electronica*. 2016;4.
- 548 38. Quast C PE, Yilmaz P, Gerken J, Schweer T, Yarza P, Peplies J, Glöckner FO. The SILVA  
549 ribosomal RNA gene database project: improved data processing and web-based tools. *Nucleic*  
550 *Acids Research*. 2013;41:D590-D6



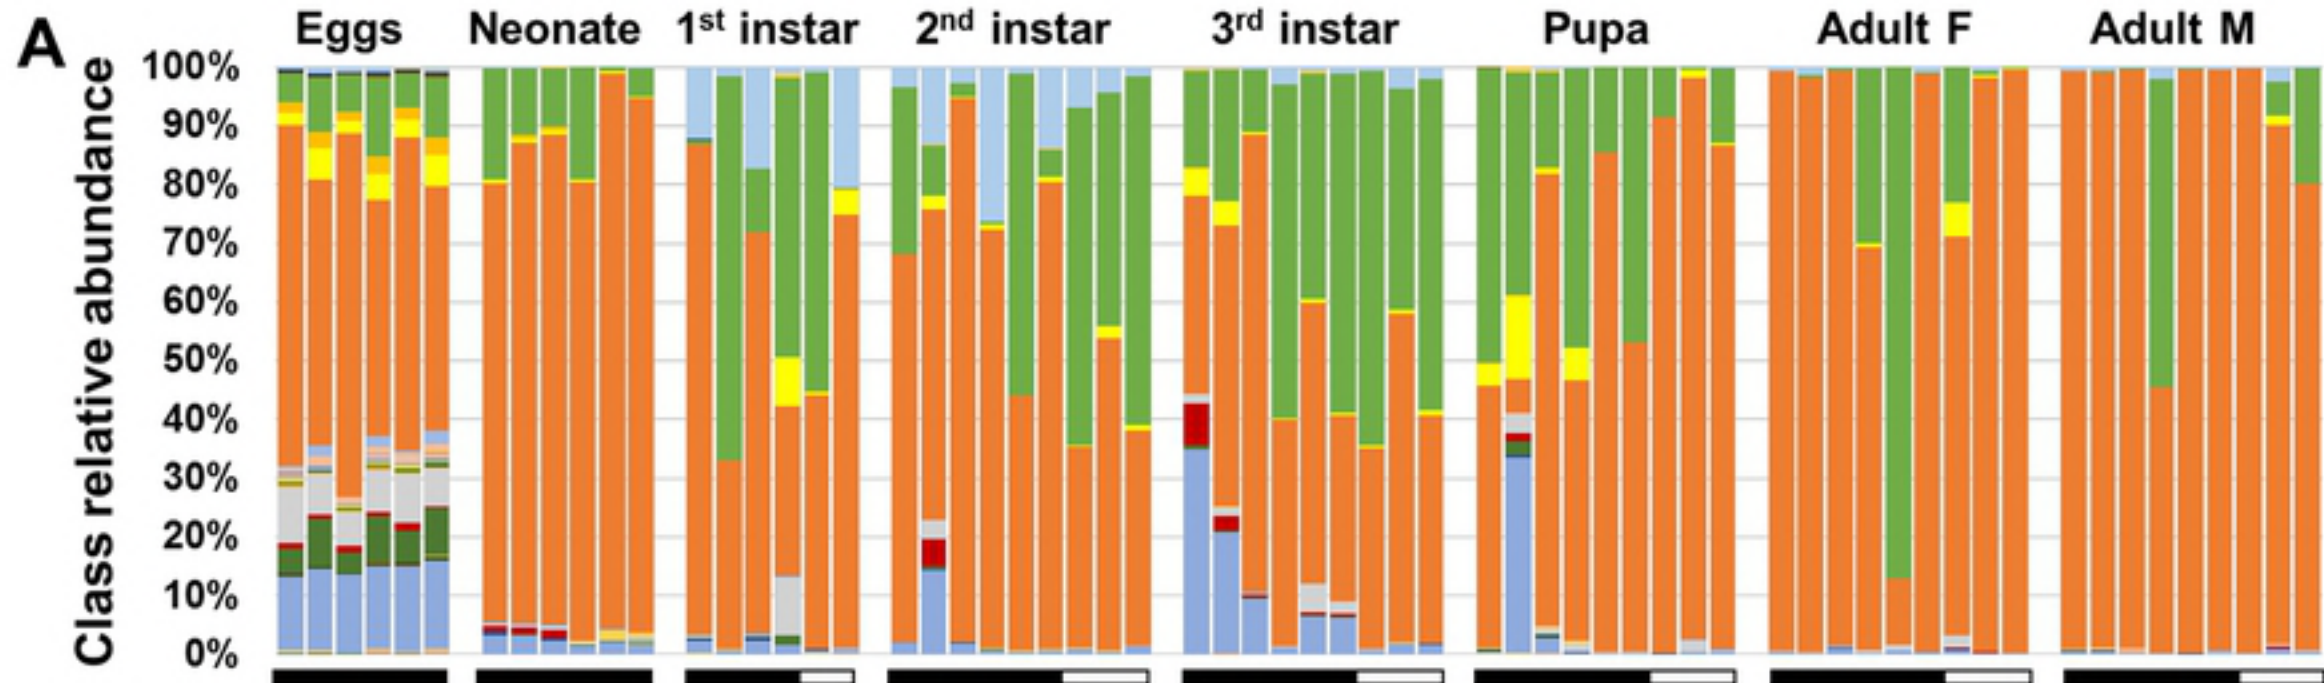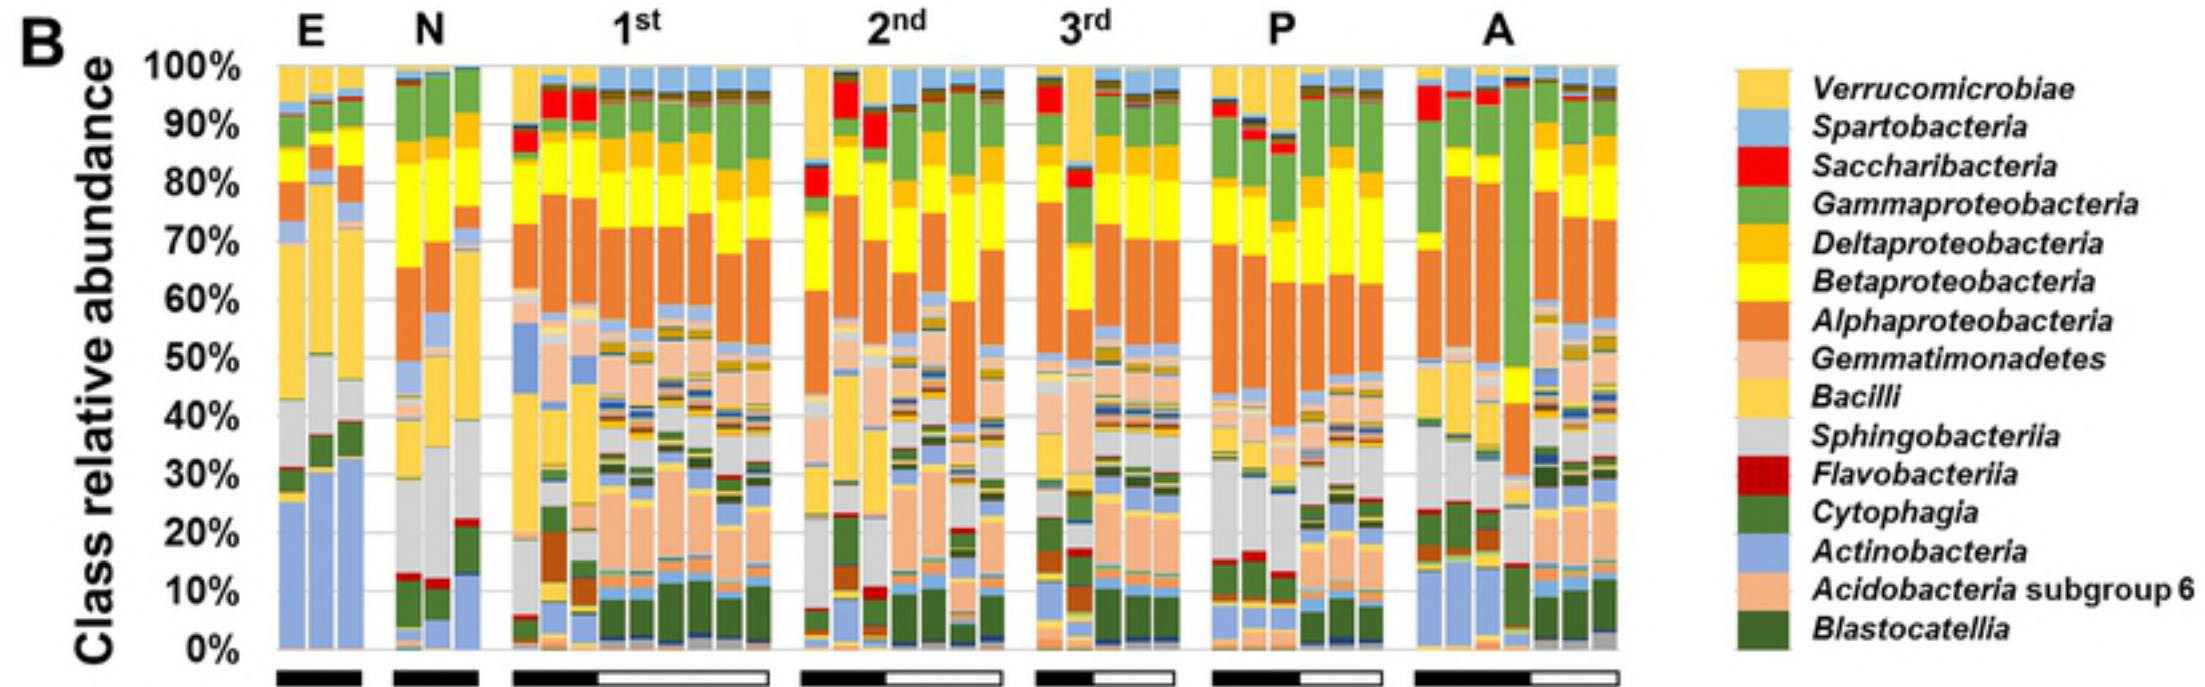

**A****Mean ( $\pm$  SEM) number of operational taxonomic units**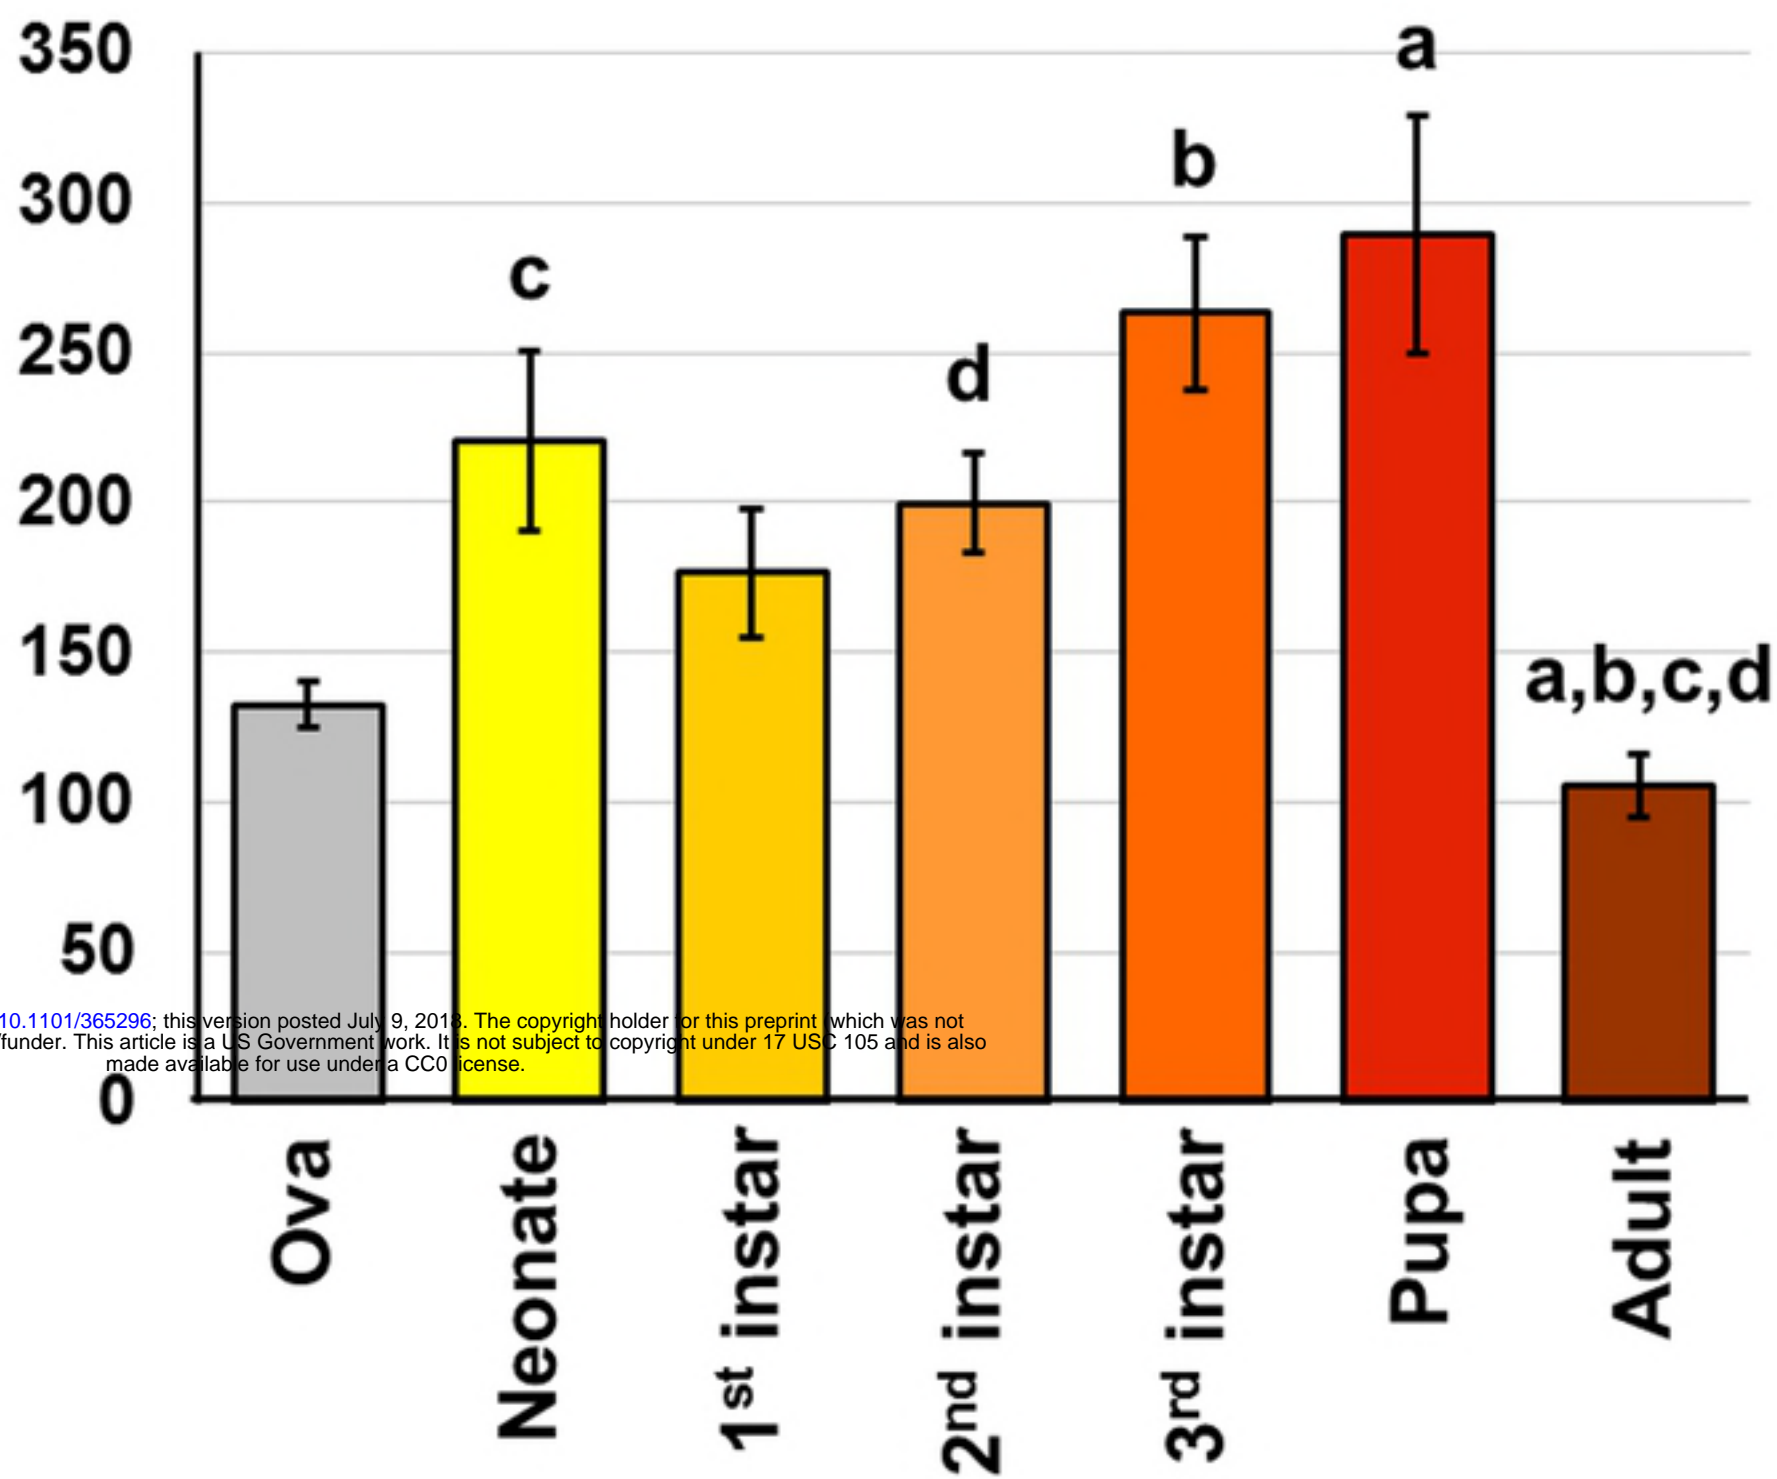

bioRxiv preprint doi: <https://doi.org/10.1101/365296>; this version posted July 9, 2019. The copyright holder for this preprint (which was not certified by peer review) is the author/funder. This article is a US Government work. It is not subject to copyright under 17 USC 105 and is also made available for use under a CC0 license.

**B****Mean ( $\pm$  SEM) number of operational taxonomic units**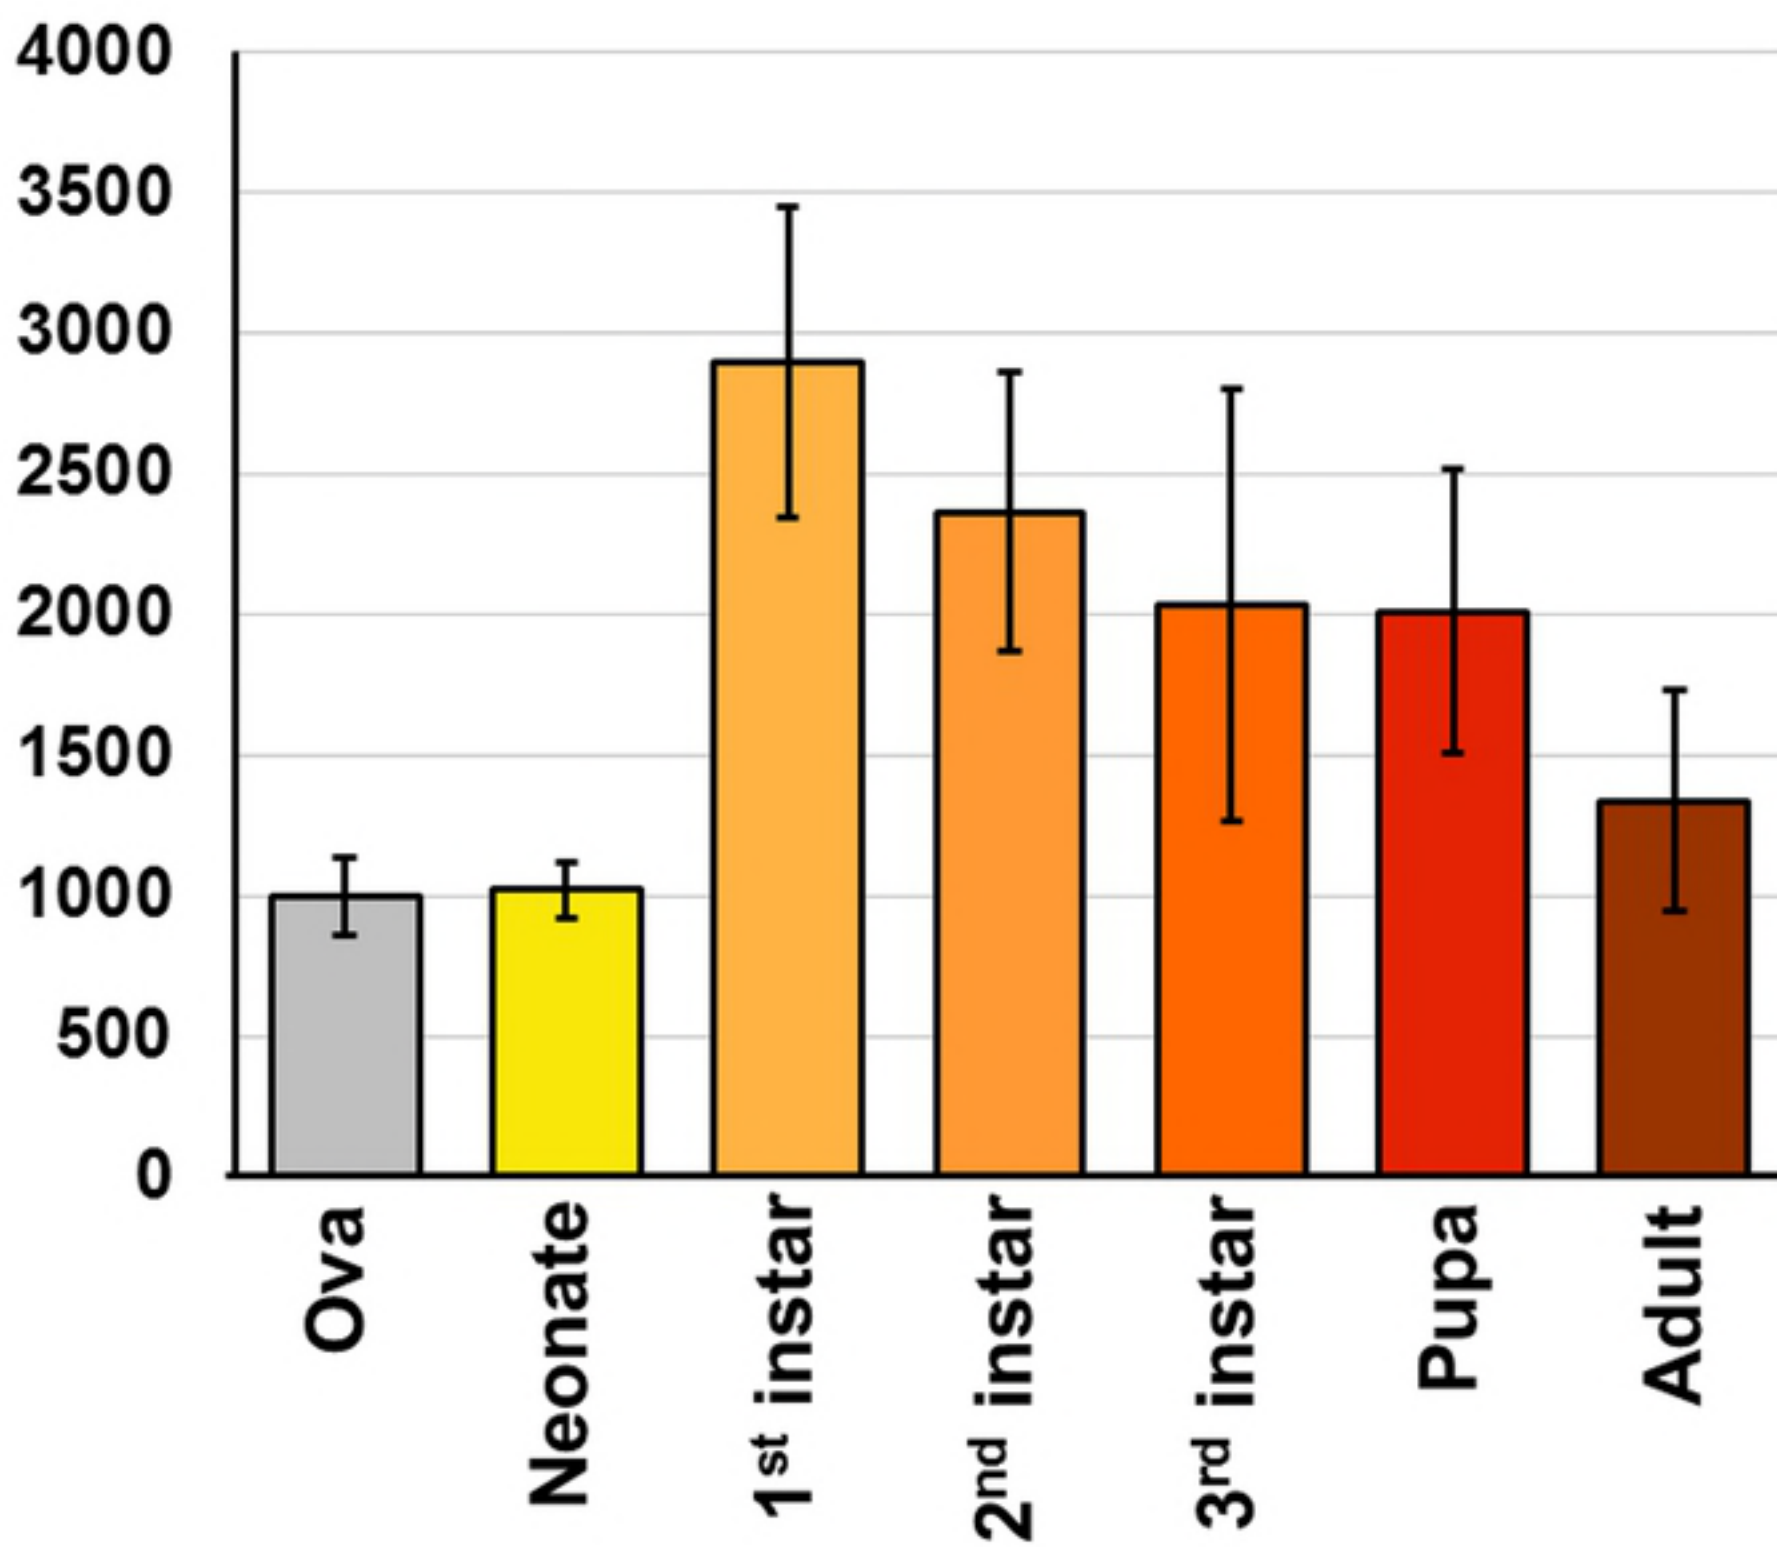

PC2 – 13.00% variation

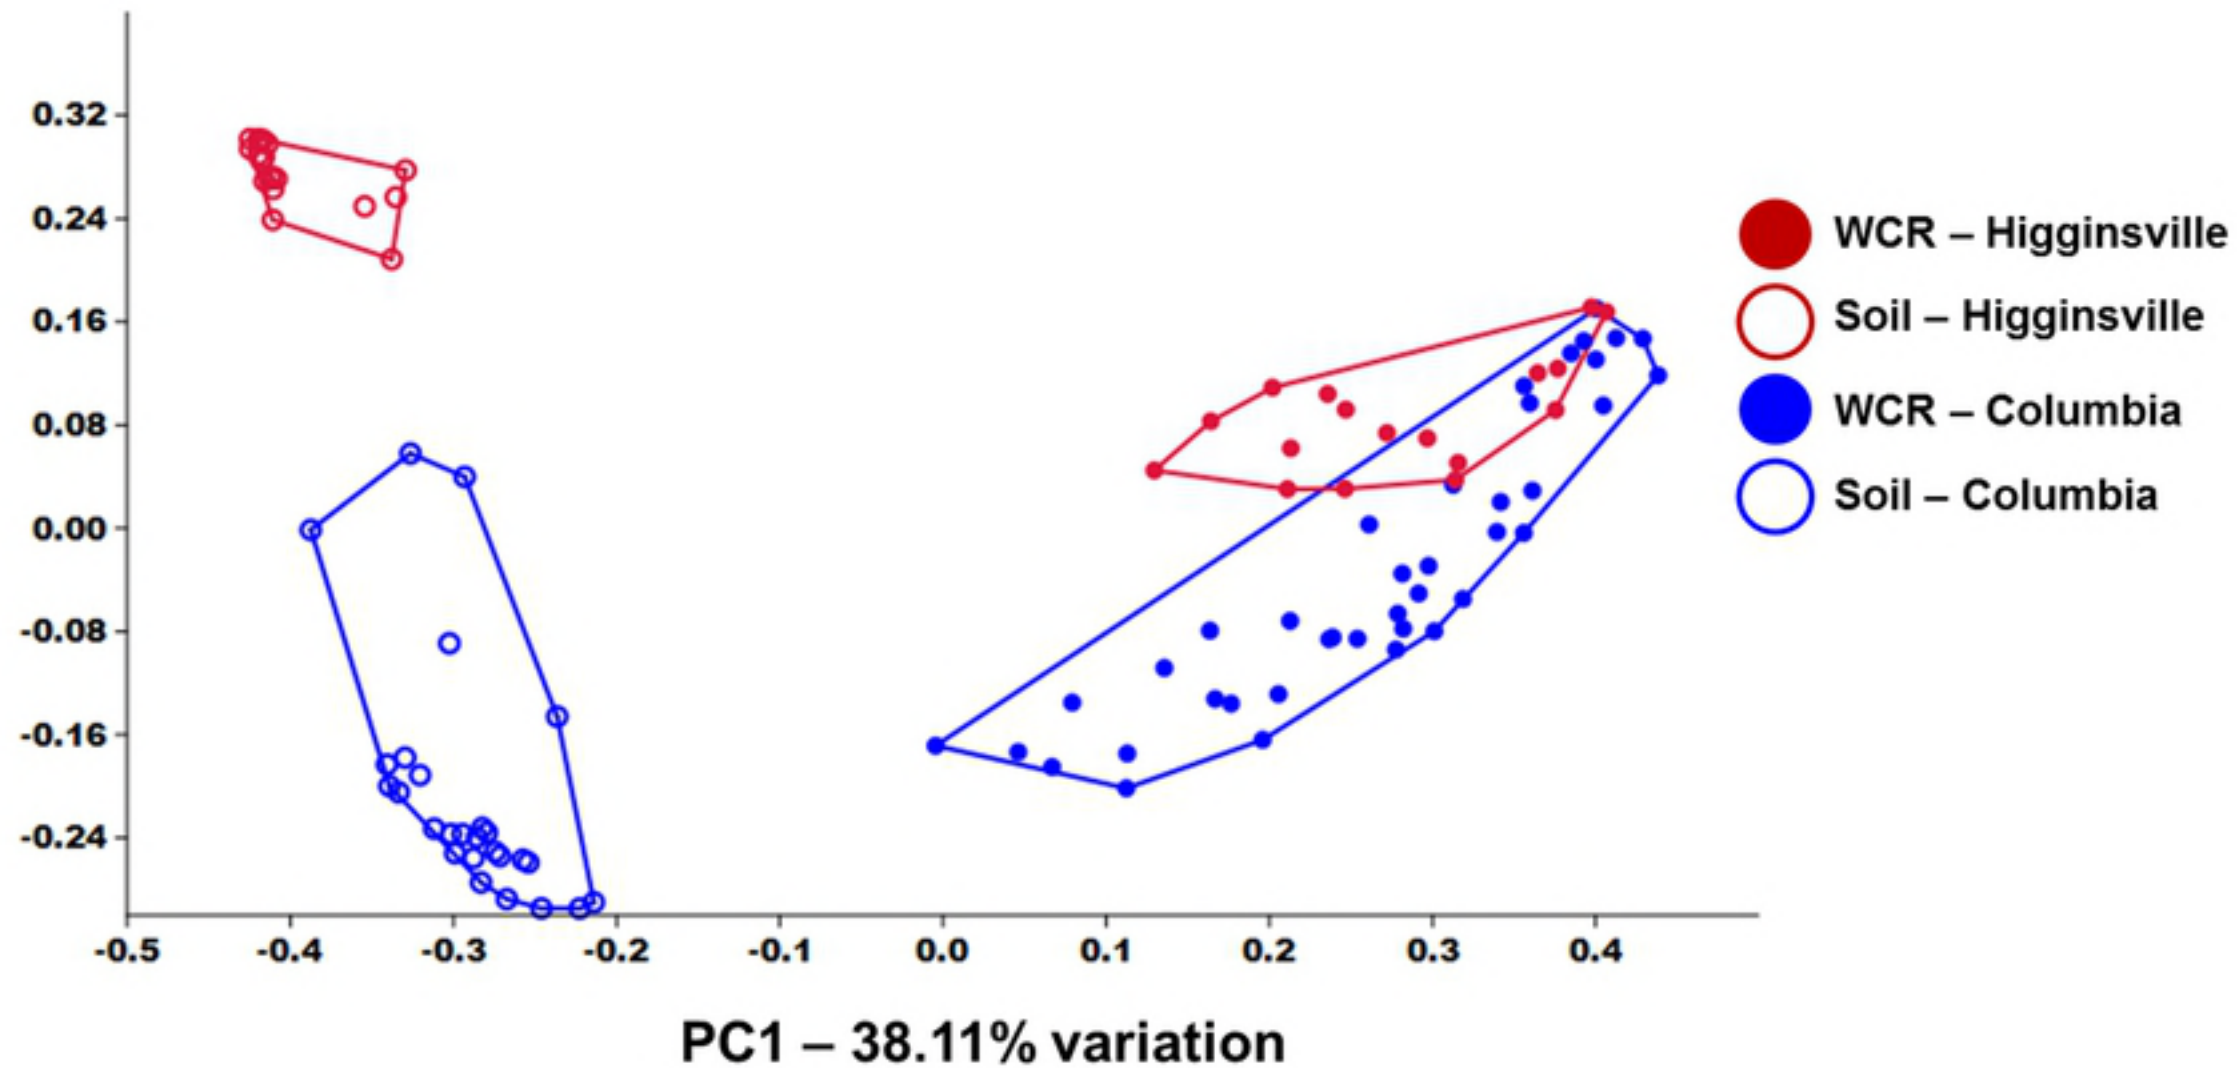

PC2 – 10.3% variation

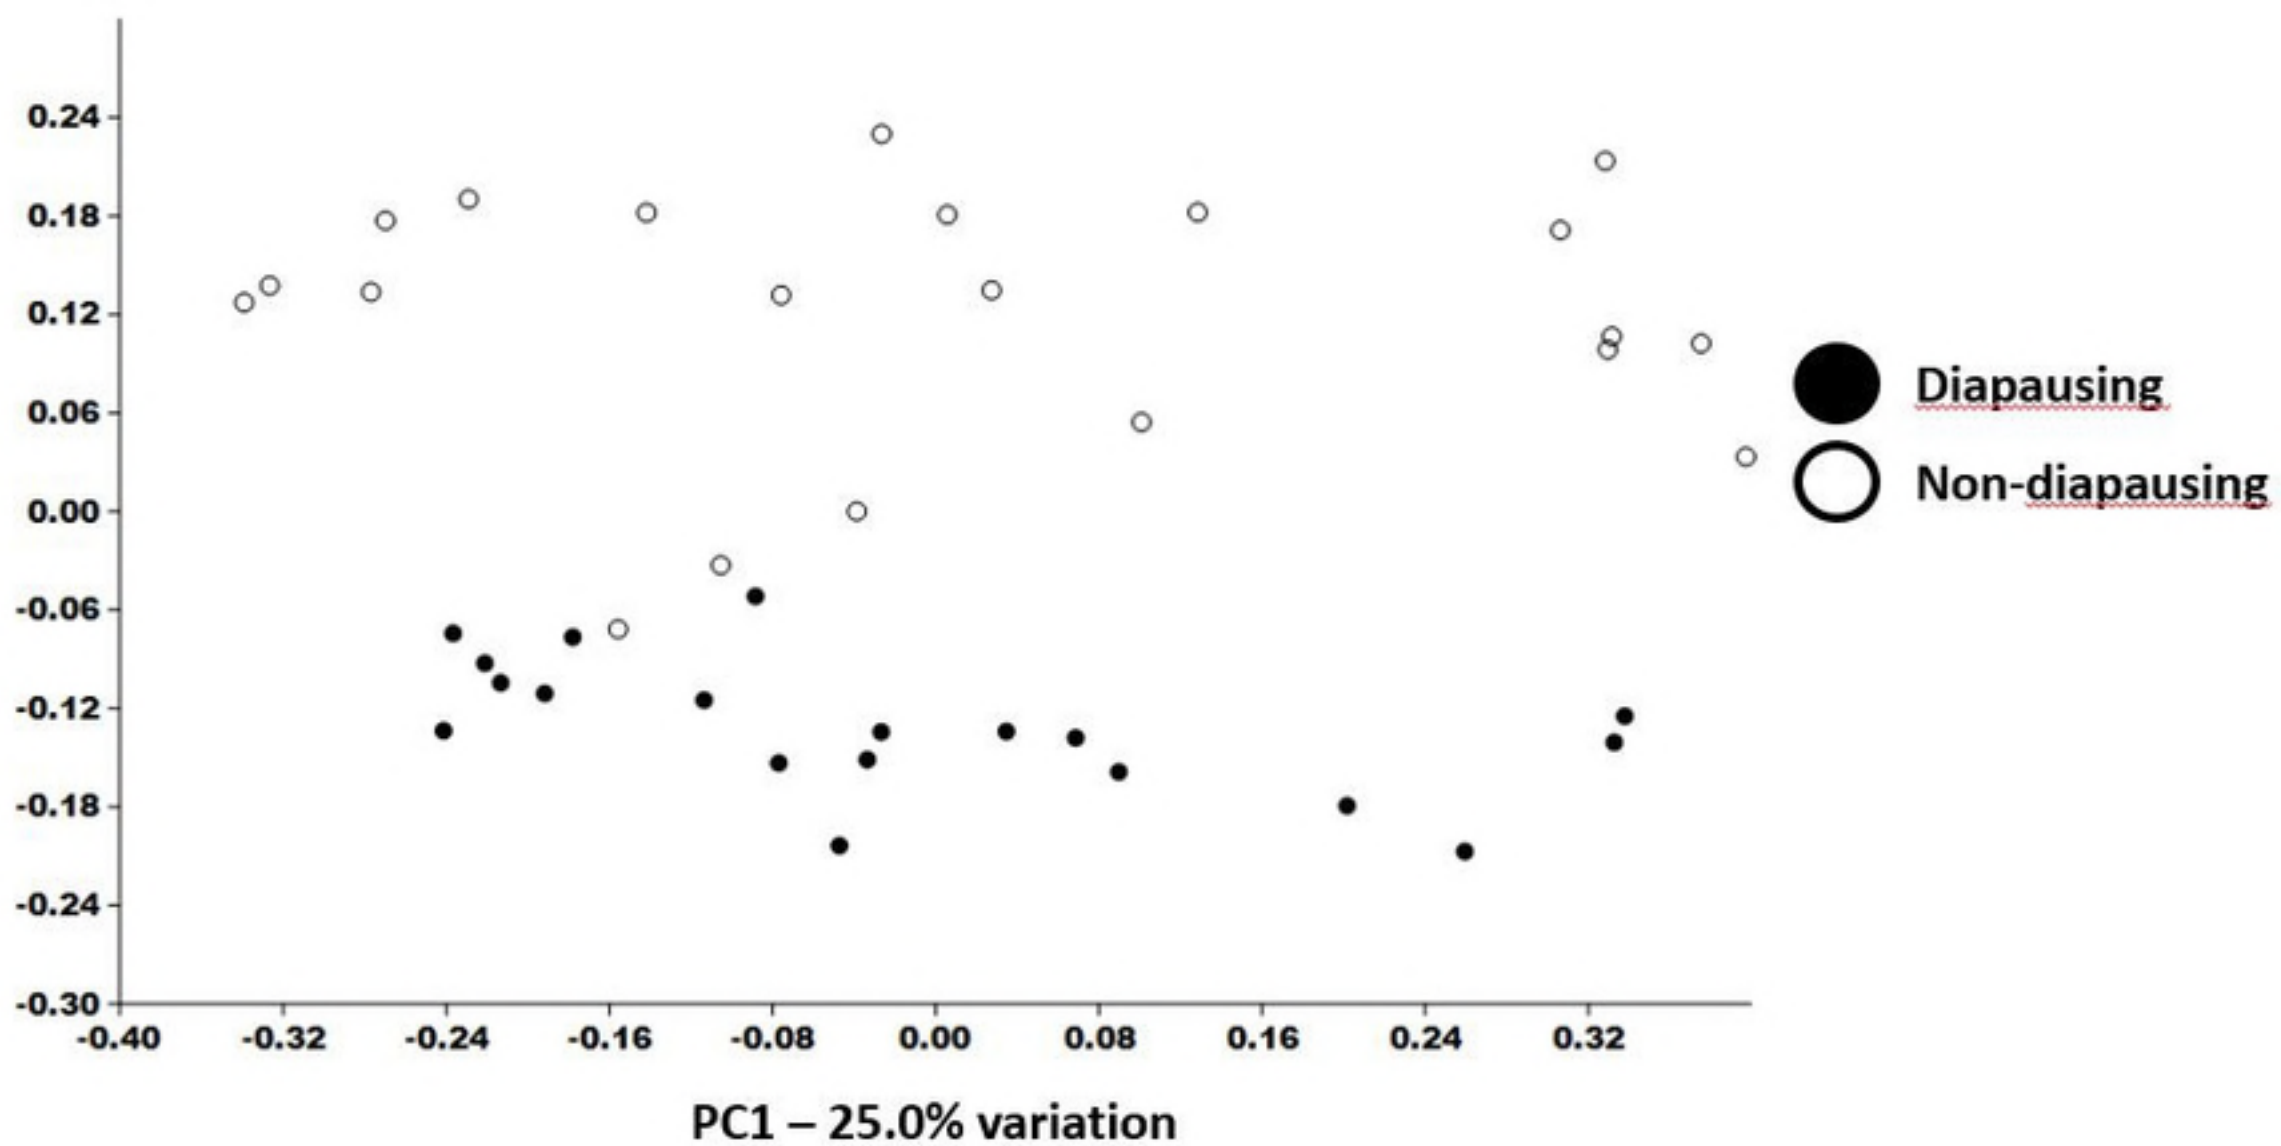

Source: https://www.biorxiv.org/content/10.1101/365296v1.full.pdf
